# Supplementary material
Source: PubMed Central journal article supplement (PMC2838963)

## Supplemental Information

# <sup>m</sup>CA\*: A New Photoproduct of 5'-Methyl Cytosine and Thymine Characterized by HPLC and Mass Spectrometry

*Dian G. T. Su, John-Stephen A. Taylor\* and Michael L. Gross\**

Department of Chemistry, Washington University in St. Louis, St. Louis, Missouri 63130

**Figure S1.** Product-ion spectra of the trinucleotides of NP1 digested photoproducts PP1 (A) and PP1\* (B), indicating a  $^m\text{C}\leftrightarrow\text{A}$  and  $\text{T}\leftrightarrow\text{A}$  photoproduct, respectively.

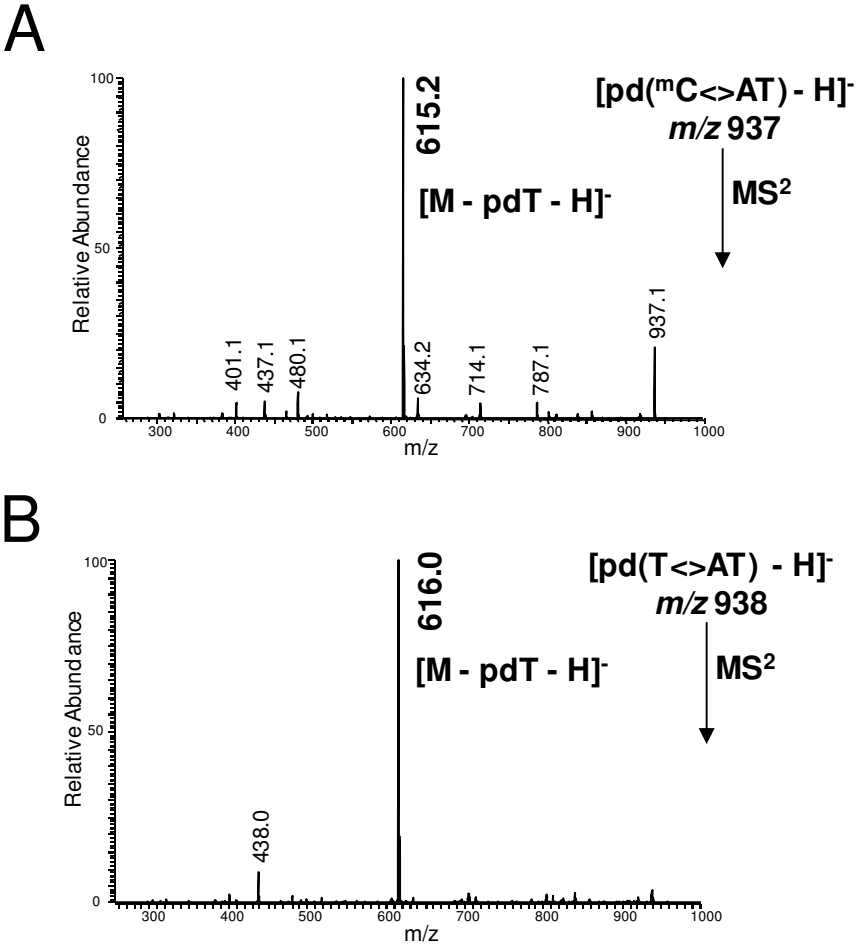

**Figure S2.** Product-ion spectra of the trinucleotides of NP1 digested photoproducts PP2 (A) and PP2\*

(B), indicating a T $\leftrightarrow$ <sup>m</sup>C and T $\leftrightarrow$ T photoproduct, respectively.

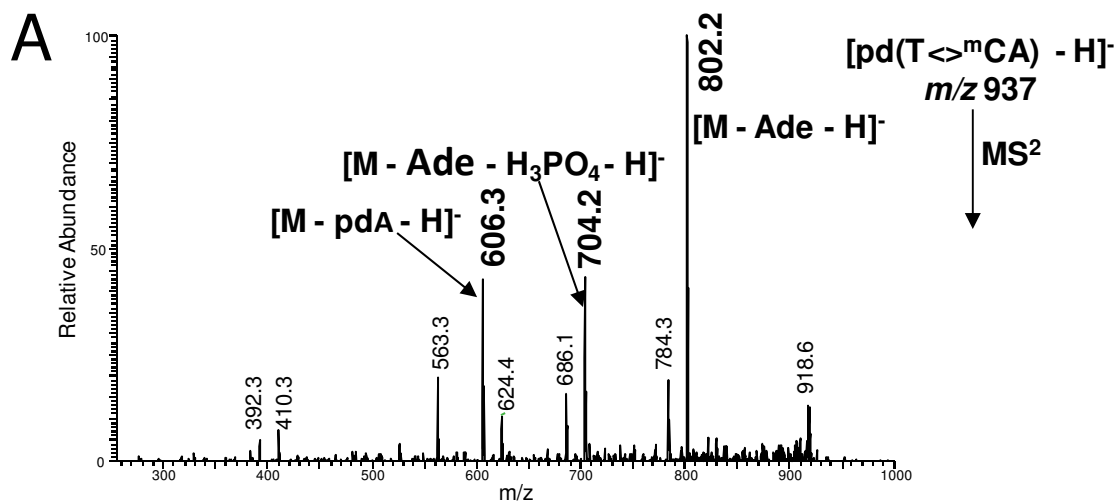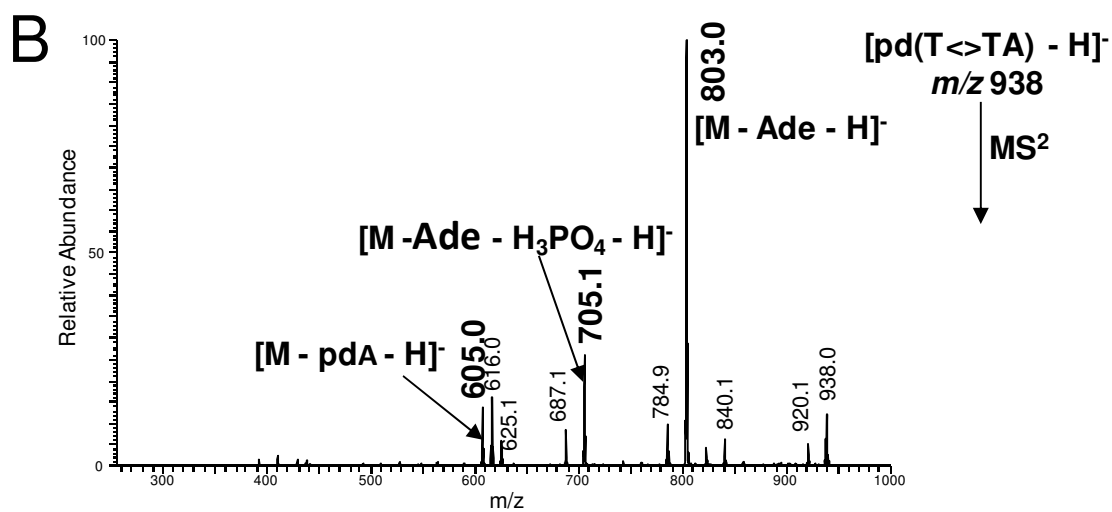

**Figure S3.** Product-ion spectrum of the trinucleotide of NP1 digested photoproduct PP3, indicating a T $\diamond$ <sup>m</sup>C photoproduct.

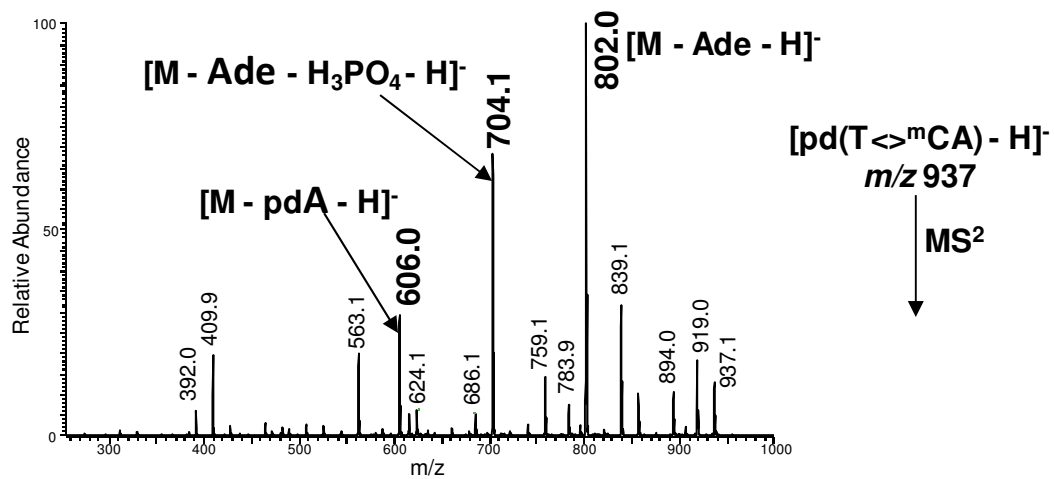

**Figure S4.** Product-ion spectrum of the trimucleotide of NP1 digested photoproduct PP4, indicating a

T $\diamond$ <sup>m</sup>C photoproduct.

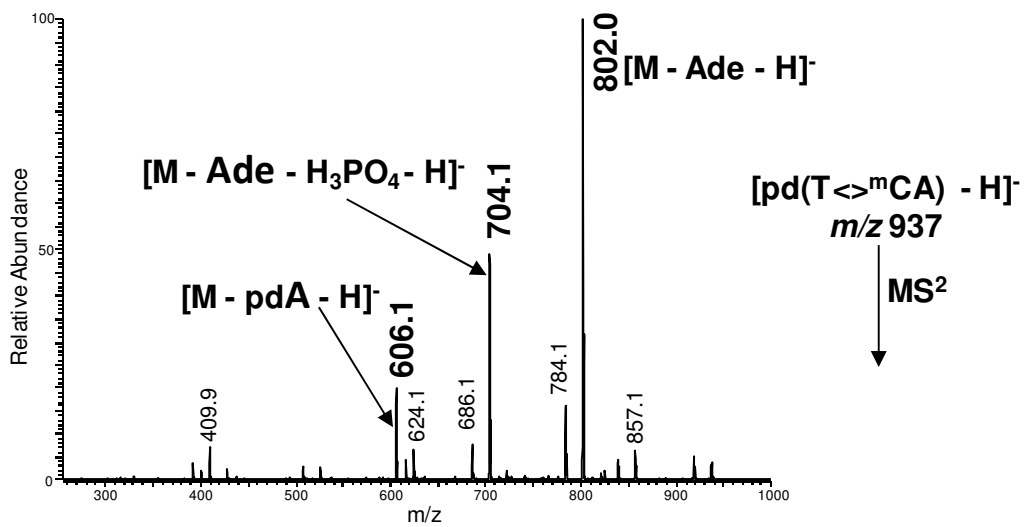

Supplement: NIHMS179961-supplement-1_si_001.pdf [file NIHMS179961-supplement-1_si_001.pdf]
